# Supplementary material
Source: PubMed Central journal article supplement (PMC5315483)
Supplement: ismej201691x1.pdf [file ismej201691x1.pdf]

# **An unprecedented strategy for the anoxic biodegradation of the xenobiotic phthalate**

Christa Ebenau-Jehle<sup>1\*</sup>, Mario Mergelsberg<sup>1\*</sup>, Stefanie Fischer<sup>1</sup>, Thomas Bröls<sup>2,3</sup>,  
Nico Jehmlich<sup>4</sup>, Martin von Bergen<sup>4</sup> and Matthias Boll<sup>1</sup>

<sup>1</sup>Faculty of Biology – Microbiology, University of Freiburg, Freiburg, Germany

<sup>2</sup>CEA, DRF, IG, Genoscope, Evry, France

<sup>3</sup>CNRS-UMR8030, Université d'Evry Val d'Essonne and Université Paris-Saclay, Evry, France

<sup>4</sup>Helmholtz Centre for Environmental Research - UFZ, Department of Molecular Systems Biology, Permoserstrasse 15, 04318 Leipzig, Germany

---

**Supplementary Material**

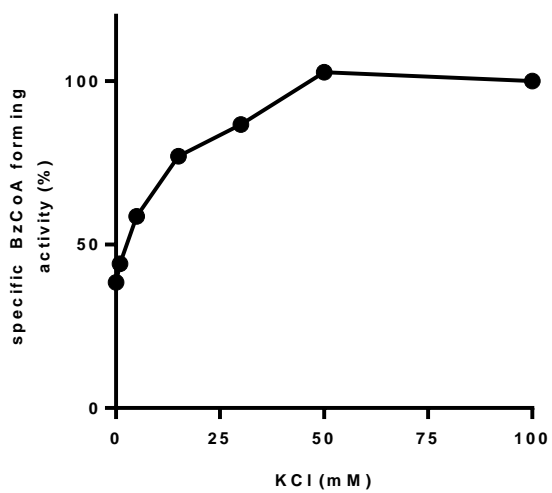

**Figure S1** Effect of supplemental KCl on phthalate and succinyl-CoA dependent benzoyl-CoA forming activity. Specific activity in the presence of 50 mM potassium chloride refers to 100%.

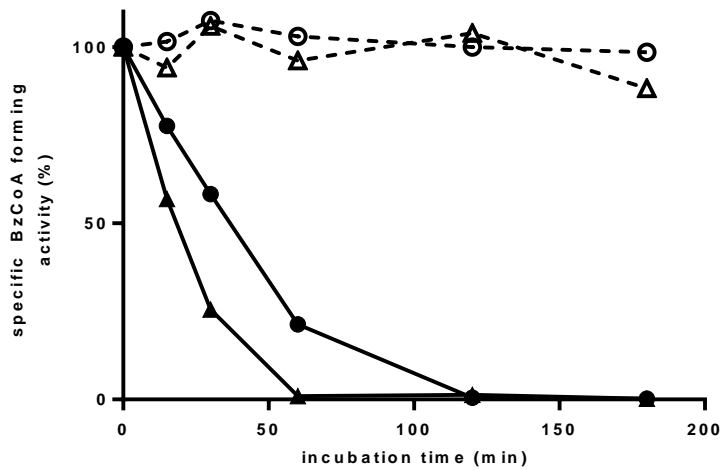

**Figure S2** Effect of air exposure on phthalate- and succinyl-CoA dependent benzoyl-CoA forming activity in the presence/absence of supplemental KCl. ● Aerobic incubation in the presence of 50 mM KCl, ○ anaerobic incubation in the presence of 50 mM KCl, ▲ aerobic incubation without supplemental KCl, △ anaerobic incubation without supplemental KCl. Specific activity is set to 100% at 0 min incubation.

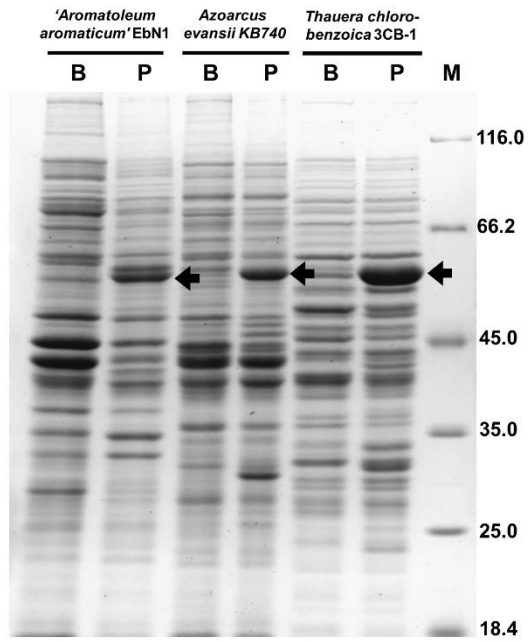

1  
2  
3  
4  
5  
6  
7

**Figure S3** SDS-PAGE of cell-free extracts of '*Aromatoleum aromaticum*' EbN1, *Azoarcus evansii* KB740 and *Thauera chlorobenzoica* 3CB1 anaerobically grown under denitrifying conditions with either benzoate (B) or phthalate (P) as carbon source. The arrows indicate the bands analyzed by M/S. The size of marker bands (M) is given in kDa.

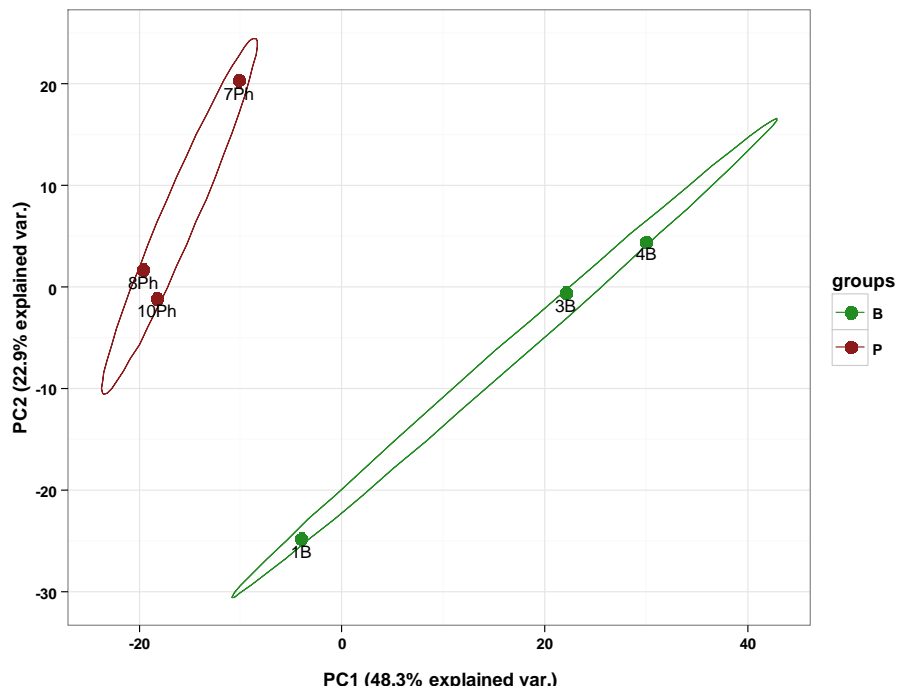

8  
9  
10  
11

**Figure S4** Principal Component Analysis (PCA) plot indicating the differences in the proteome pattern of *A. aromaticum* grown on benzoate (green) or phthalate (dark red).

12 **Table S1** Inhibition of benzoyl-CoA formation in cell-free extracts of phthalate grown *T. chlorobenzoica*  
13 by 2-cyanobenzoyl-CoA. Extracts of cells grown with phthalate were incubated for 15 min with 100  $\mu$ M  
14 2-cyanobenzoyl-CoA which was also supplemented in the enzyme assay at the same concentration.  
15 Errors are given as standard deviations of the mean of two biological replicates.  
16

|                                              | Succinyl-CoA<br>consumption<br>(nmol min <sup>-1</sup> mg <sup>-1</sup> ) | CoA formation<br>(nmol min <sup>-1</sup> mg <sup>-1</sup> ) | Benzoyl-CoA<br>formation<br>(nmol min <sup>-1</sup> mg <sup>-1</sup> ) |
|----------------------------------------------|---------------------------------------------------------------------------|-------------------------------------------------------------|------------------------------------------------------------------------|
| Control without 2-cyanobenzoyl-CoA           | 24 $\pm$ 2                                                                | 3 $\pm$ 1                                                   | 12 $\pm$ 1                                                             |
| After incubation with 2-cyanobenzoyl-<br>CoA | 23 $\pm$ 4                                                                | 15 $\pm$ 3                                                  | 3 $\pm$ 1                                                              |

17  
18  
19

20 **Table S2** List of proteins identified by proteome analysis. See online Microsoft excel-file Table S2.
